# Supplementary material
Source: PubMed Central journal article supplement (PMC7486337)
Supplement: mmc1.pdf [file mmc1.pdf]

## Supplementary Table 1:

### **A. List of Hospitals participated in the survey: (centre-1-7: Northern part of India; 8-11: Southern part of India; 12-17: Western part of India;18-19: Eastern part of India)**

1.All India Institute of Medical Sciences, New Delhi (Public), 2.Postgraduate Institute of Medical Education and Research, Chandigarh (Public), 3. Sanjay Gandhi Postgraduate Institute of Medical Sciences, Lucknow, UP (Public), 4. Institute of Medical Sciences, BHU, Varanasi, UP (Public), 5. Medanta- Medicity, Gurugram (Pvt.), 6. Sir Ganga Ram Hospital, New Delhi (Pvt.); 7.Opal Hospital, Kakarmatta, Varanasi, UP (Pvt.), 8. Government Stanley Hospital, Chennai (Public), 9. Osmania General Hospital, Hyderabad (Public),10. Madras medical college, Chennai (Public), 11. Yashoda Hospitals, Secunderabad (Pvt.), 12. Muljibhai Patel Urological Hospital, Nadiad, Gujarat (Pvt.),13. Aditya Birla Memorial Hospital, Pune, Maharashtra (Pvt.),14.Lancelot kidney Centre, Mumbai, Maharashtra (Pvt.),15.King Edward Memorial Hospital, Pune, Maharashtra (Pvt.),16.Global Hospital, Mumbai, Maharashtra (Pvt.), 17. AVBRH and JNMC, Sawangi Meghe, Wardha, Maharashtra (Pvt.),18. Neotia Getwel Healthcare, Centre, Siliguri, Darjeeling, West Bengal (Pvt.) 19. Institute of Post Graduate Medical Education and Research, Kolkata (Public.).

### **B. Sample of Survey Questionnaire**

#### **Effect of lockdown on non-COVID kidney patients during COVID pandemic**

Name of the institute/hospital:

Government/Private sector:

#### **Dialysis:**

- No of patients on MHD (include patients awaiting transplant)
- No of dialysis stations before lockdown
- No of dialysis stations after lockdown
- No of MHD patients before lockdown
- No of MHD patients after lockdown
- No of patients missing MHD
- Did your patients decrease the frequency of HD due to lockdown (Yes/No)  
If Yes, % of such pts
- Did you decrease the frequency of HD in patients, if yes % of patients?

- No of patients landing into emergency due to lockdown
- Did you facilitate patients arrival to HD unit, if yes then how
- How many patients on MHD tested for COVID
- Criteria for testing MHD patients for COVID in your unit- ICMR or treating doctor –decision
- How many patients tested positive for COVID
- Have you isolated COVID MHD patients- yes/No, If yes, isolated room or dedicated machine or dedicated shift
- How many patients permanently absent from HD
- Any known death of patients during lockdown because of missing dialysis

**For PD patients:**

- Number of PD patients in your unit
- Were there any difficulties in supply of bags for PD patients? If yes in which states
- Any positive PD patients if yes, then how bags and tubing are discarded?

**OPD service:**

- How many new patients in OPD per day before?
- Are OPD in your hospital functioning Yes / No, if yes then how many new patients in OPD per day after?
- How much percentage revenue decline from OPD per week?
- Do you advise patients using telemedicine? Yes or NO  
If yes, what mode (more than one also OK): Phone call/Whatsapp/Email/Zoom/Skype/Other
- Did you charge the patients for telephonic consults? (Yes/No)

**Indoor patients (admitted patients):**

- How many indoor patients you used to have before lockdown?
- How many indoor patients you used to visit after?
- How many COVID infected patients you have in IPD under your care?
- Do you think that Non-Covid patients have borne the brunt of COVID pandemic?
- How many patients without COVID you guess those have lost life?

**COVID patients**

- How many total COVID patients you have seen during pandemic?
- What was the nature of kidney illness?
- Have you seen COVID related renal disease? If yes, what type of kidney disease? Glomerular or AKI
- Did you provide RRT support to any of the COVID patients? Yes/No
- If yes, number of patients, mode of RRT, duration of RRT and outcome of patient.
- What is the number of doctors in your unit?
- How many non-doctor staffs are there in your unit?
- How many doctors have been quarantined due to COVID exposure? And from which area: Dialysis / Ward / RT area?

Please tick what protective consumable you use for respective procedure

|                              | Triple Layer Mask | N-95 Mask | Face Shield/Goggles | Full PPE |
|------------------------------|-------------------|-----------|---------------------|----------|
| All HD Pts                   |                   |           |                     |          |
| Central Vein Catheterization |                   |           |                     |          |
| Femoral Catheterization      |                   |           |                     |          |
| CAPD catheter insertion      |                   |           |                     |          |
| During Intubation            |                   |           |                     |          |
| During resuscitation         |                   |           |                     |          |

**For yourself (Health care worker)**

- Are you taking any precautions when you go back home? If yes then what?

- What is policy of your hospital If you develop symptoms of flu
  - Get tested for COVID
  - isolate yourself without testing
- Have you been quarantined?
- Are you worried about COVID?
  - No, it is all a hype
  - Little concerned
  - Am losing sleep over COVID
